# Supplementary material
Source: MDPI journal article supplement (https://www.mdpi.com/2673-4605/4/1/46)
Supplement: s1 [file s1]

# The Influence of Surface Protein Adsorption on Gold Nanoparticle Intratumoral Distribution and Retention

Rossana Terracciano,<sup>1,2</sup> E. Brian Butler,<sup>3</sup> Danilo Demarchi,<sup>2</sup> Alessandro Grattoni,<sup>1,3,4</sup> and Carly S. Filgueira<sup>1,5</sup>

<sup>1</sup>Department of Nanomedicine, Houston Methodist Research Institute, Houston, TX, <sup>2</sup>Department of Electronics, Politecnico di Torino, Torino, Italy, <sup>3</sup>Department of Radiation Oncology, Houston Methodist Research Institute, Houston, TX, <sup>4</sup>Department of Surgery, Houston Methodist Research Institute, Houston, TX, <sup>5</sup>Department of Cardiovascular Surgery, Houston Methodist Research Institute, Houston, TX

## Background/Introduction

The biological effects of GNPs in the tumor microenvironment, including the particle-protein interaction and the consequent impact on cellular pathways and contrast enhancement remain unclear [1]. In this regard, further investigations regarding the effects of GNP-surface passivation on X-ray attenuation as well as in vivo biodistribution will clarify several aspects still under discussion from the scientific community, which so far have limited the clinical translation of their theranostics applications cancer-related [2-4].

## Purpose/Objectives/Hypothesis

- Evaluate the influence of protein surface adsorption on the GNP biodistribution in Lewis Lung Carcinoma (LLC) tumor-bearing mice using high resolution Computed Tomography (CT) preclinical imaging.

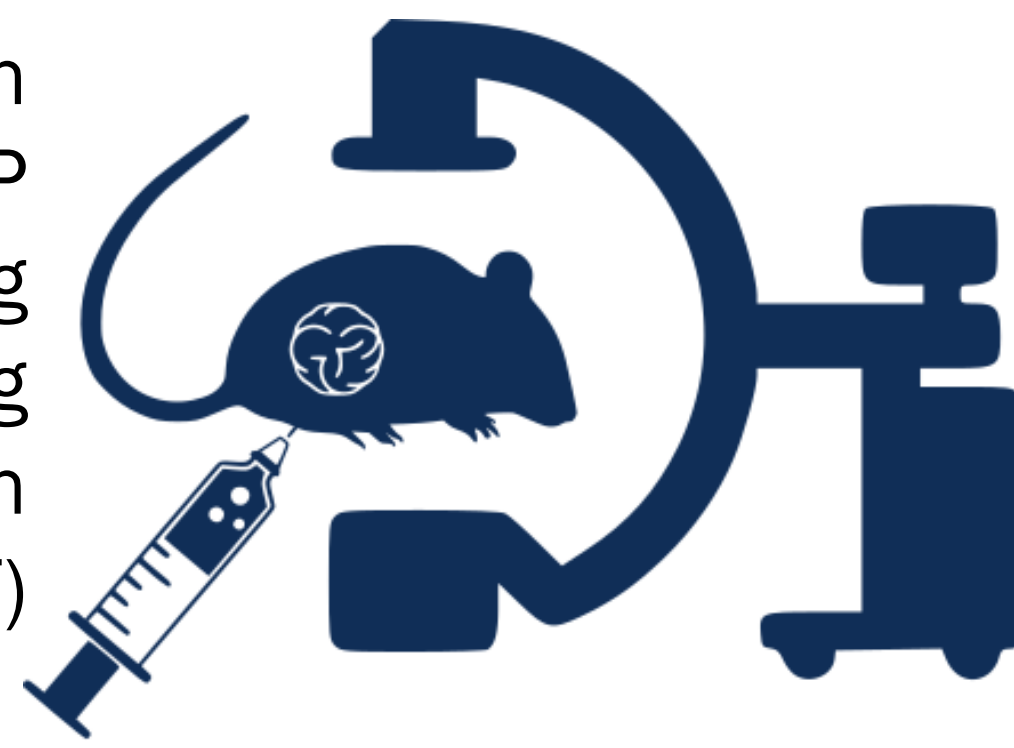

- Hypothesis: the adsorption of proteins on the GNP surface can influence the intratumoral distribution and retention of the particles.

## Methods

### Gold Nanoparticles Models

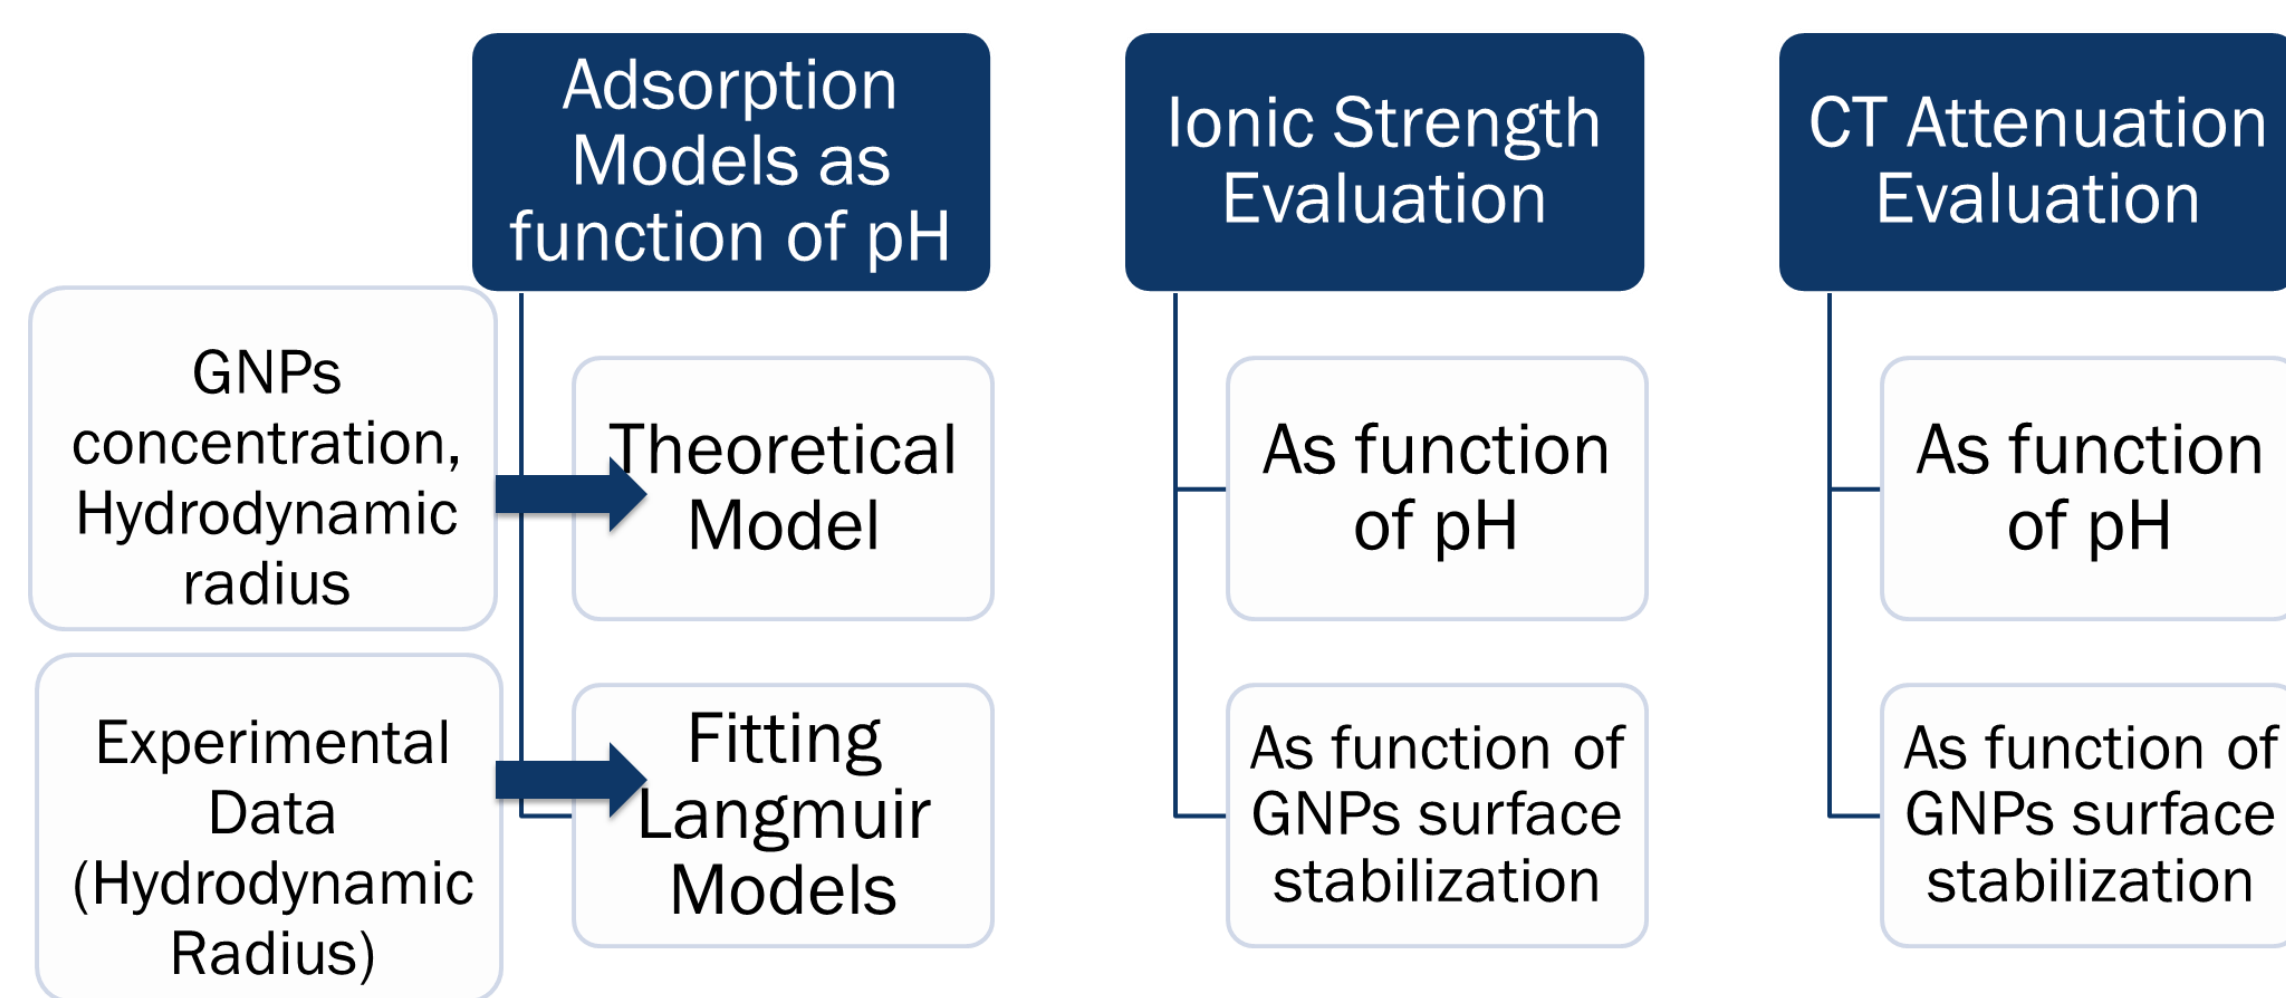

### In Vivo Timeline

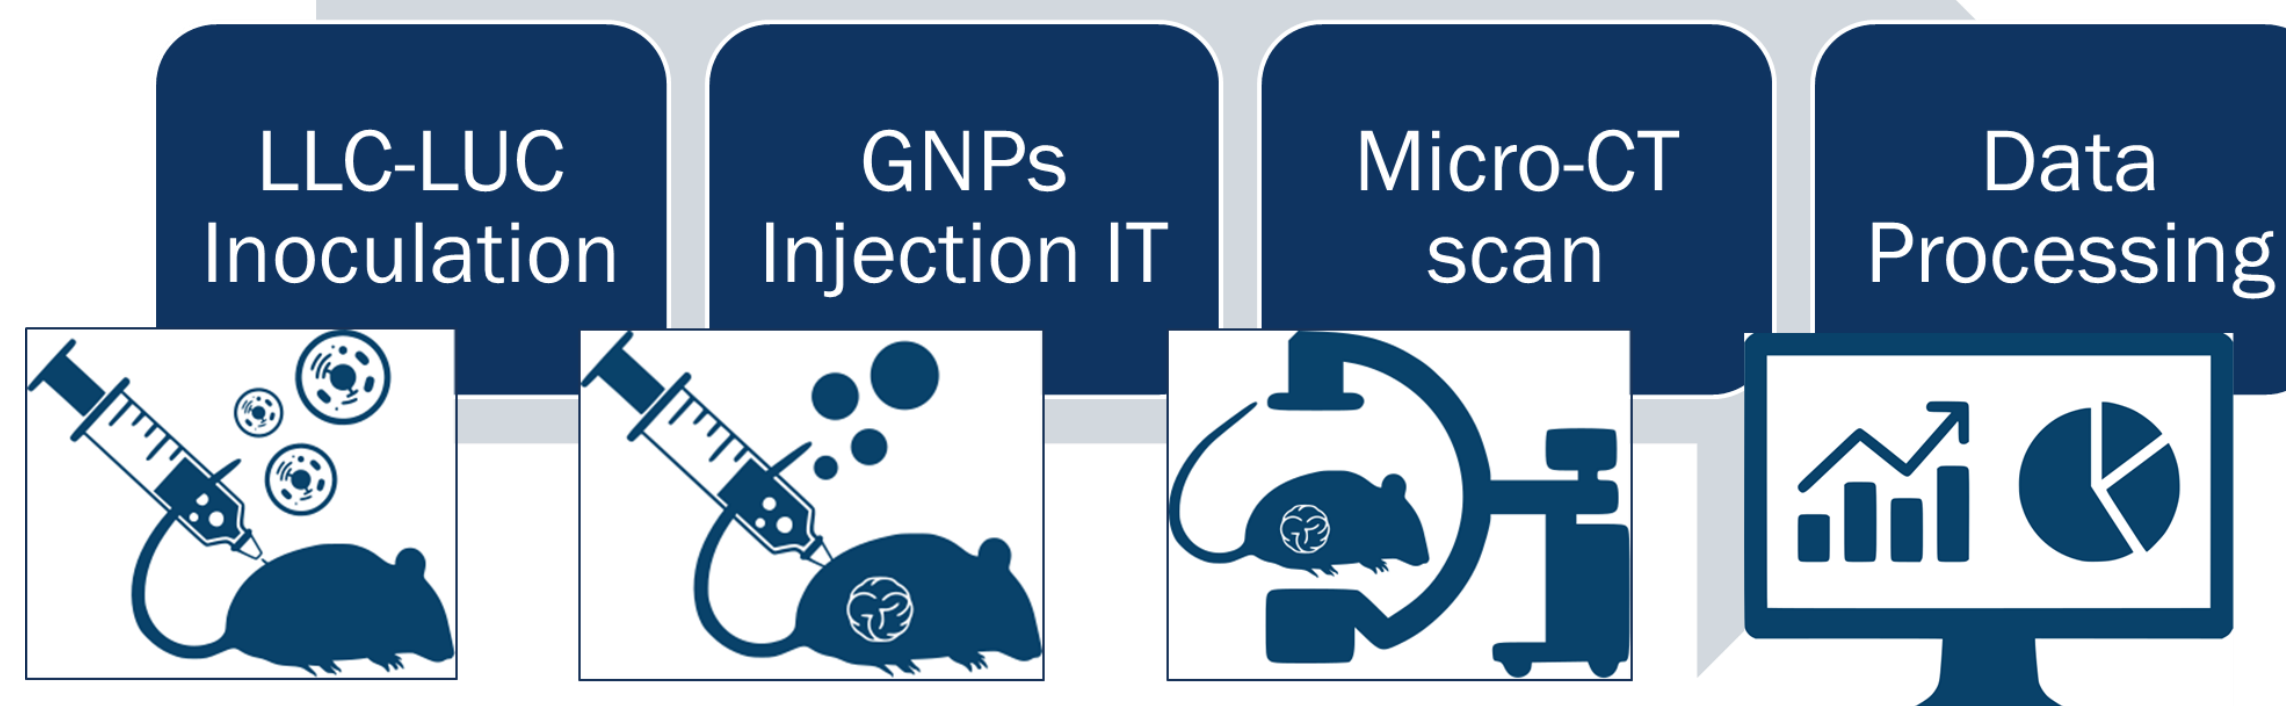

## Result

**Figure 1.** GNPs Characterization and In Vitro Study. Absorbance peak in the UV-Vis spectrum of the gold nanoparticles citrate stabilized and functionalized with bovine serum albumin as well as their size and shape captured by electronic microscopes (A). The pH influence on the adsorption of proteins on GNPs with a transition from monolayer to multilayer structures (B). GNPs presents higher X-ray attenuation properties compared to a standard contrast agent (C). In vitro study to evaluate the uptake of GNPs by Lewis lung carcinoma cells: optical and electronic microscopy images of treated cells and incubated for 24h (D) and trypan blue assay for cytotoxicity (E). Significance ( $p < 0.05$ ) in the internalization depending on the surface functionalization.

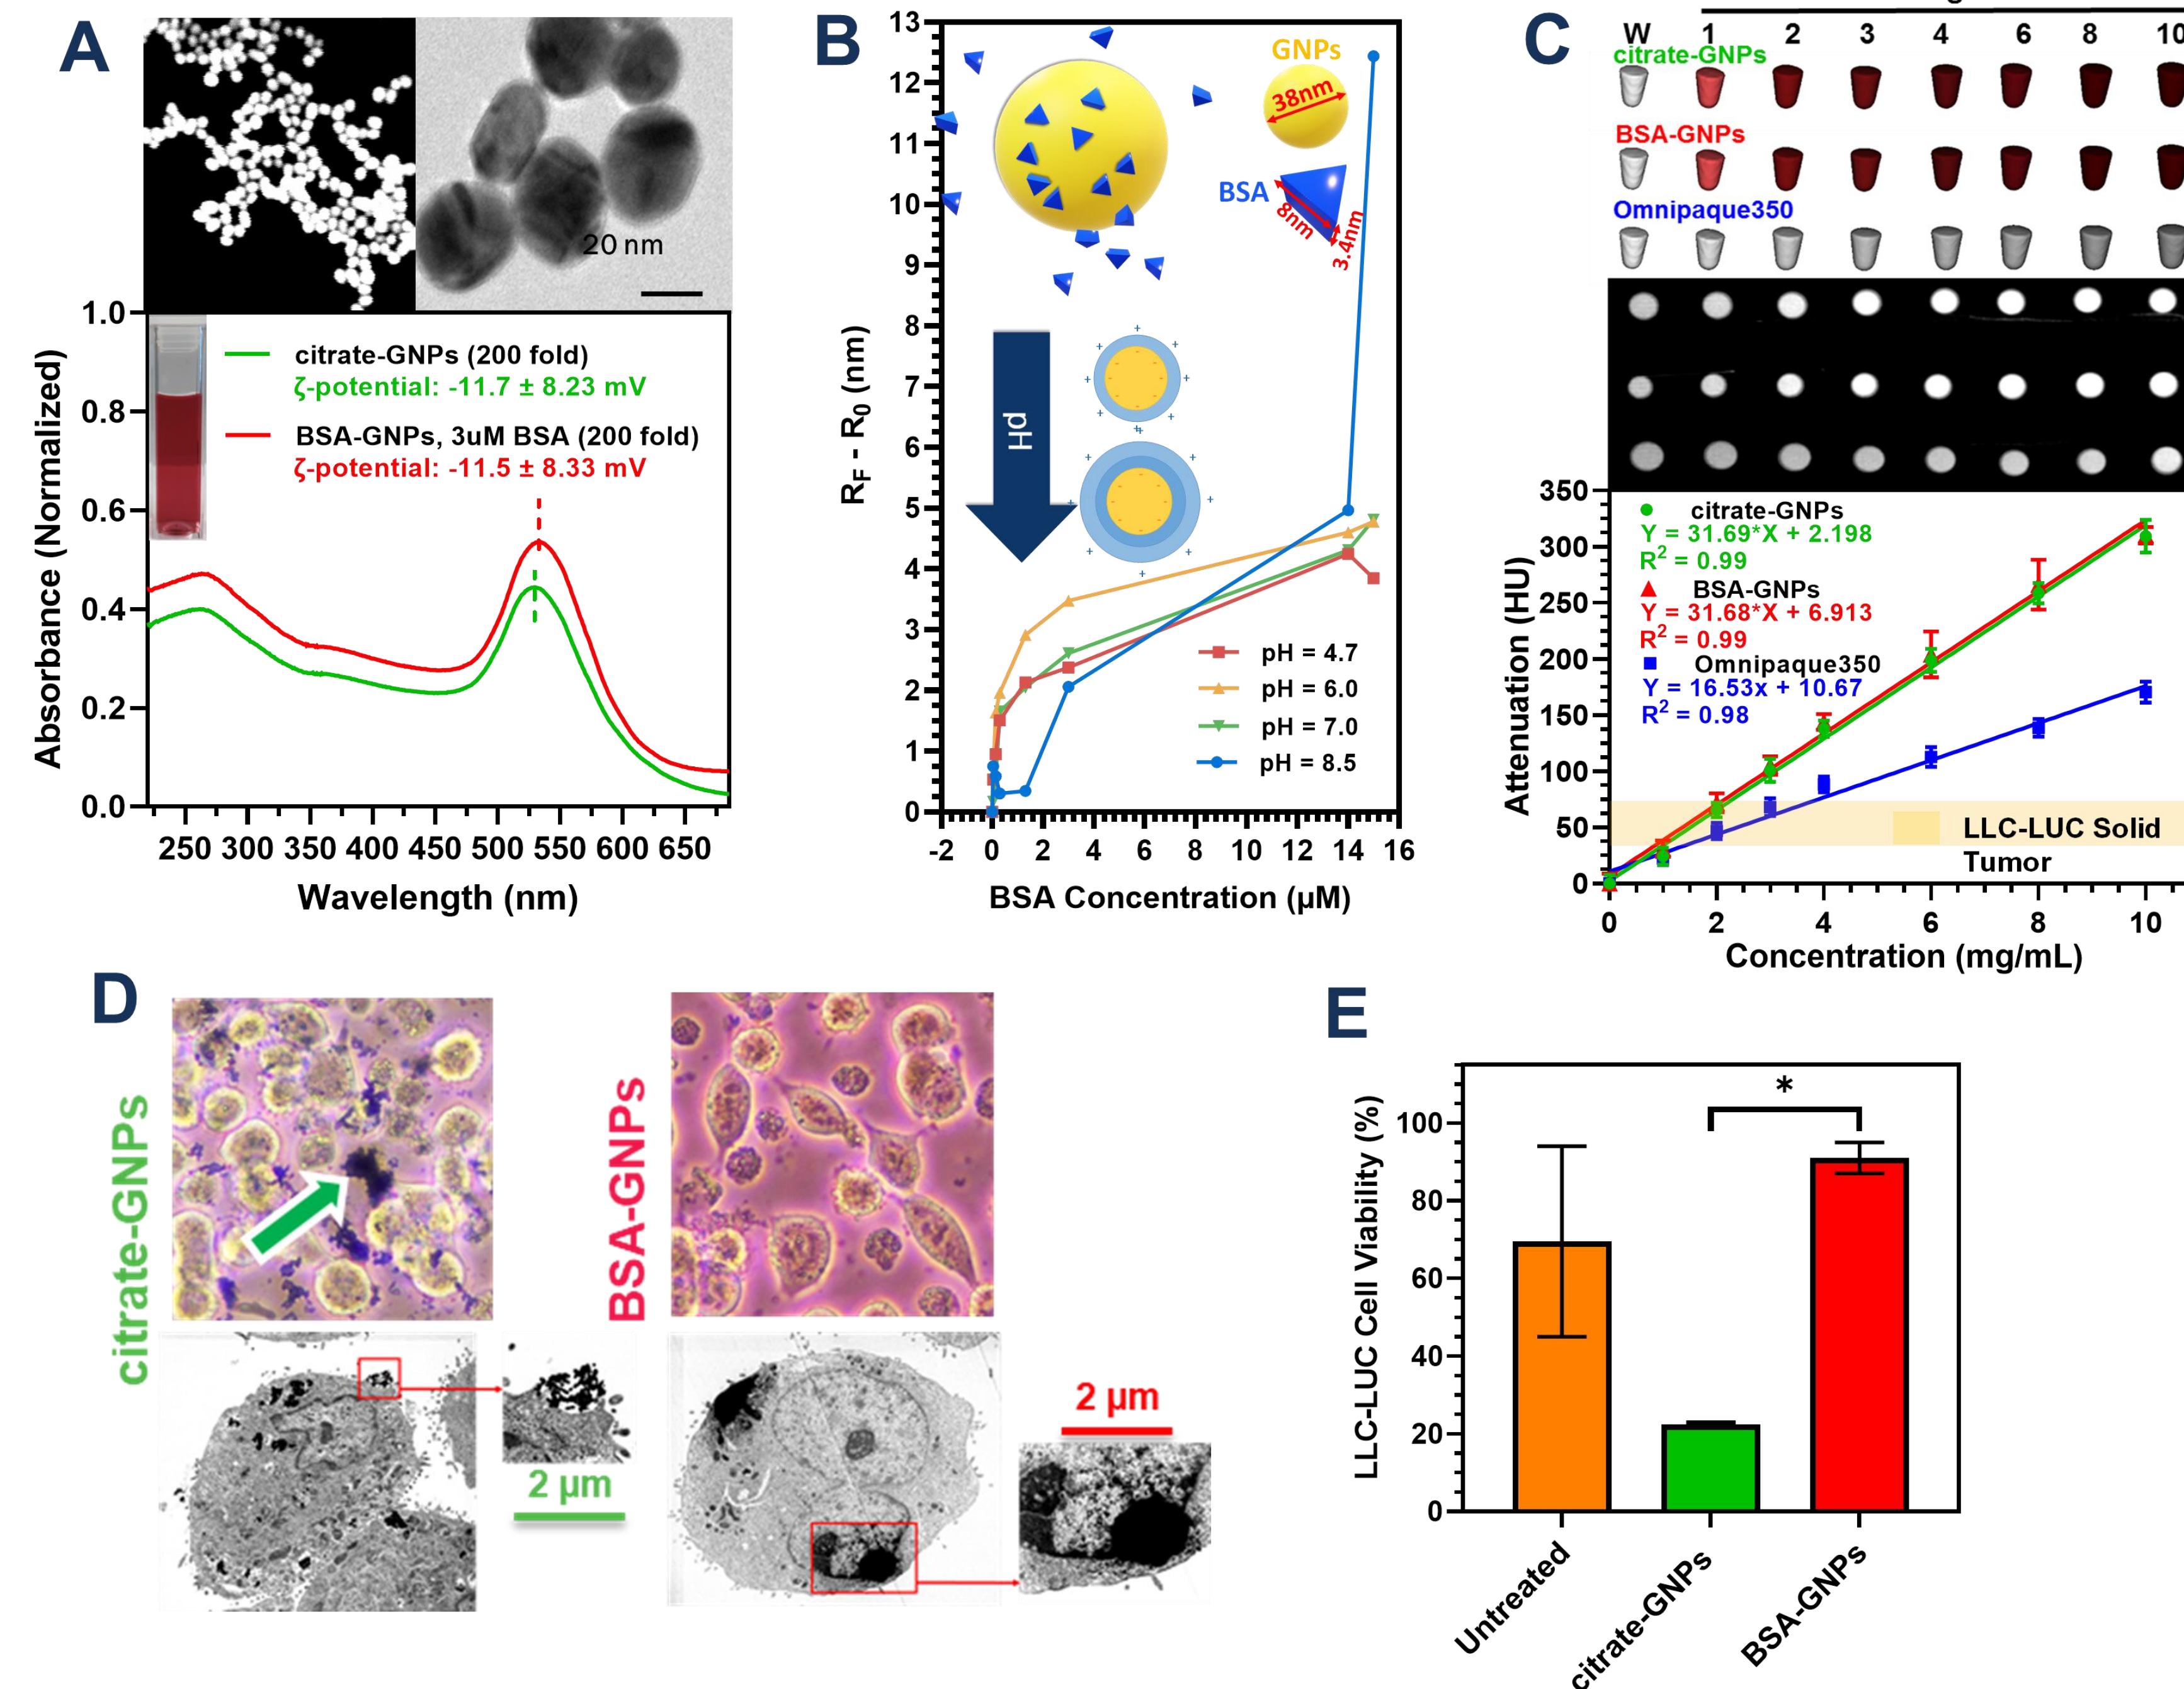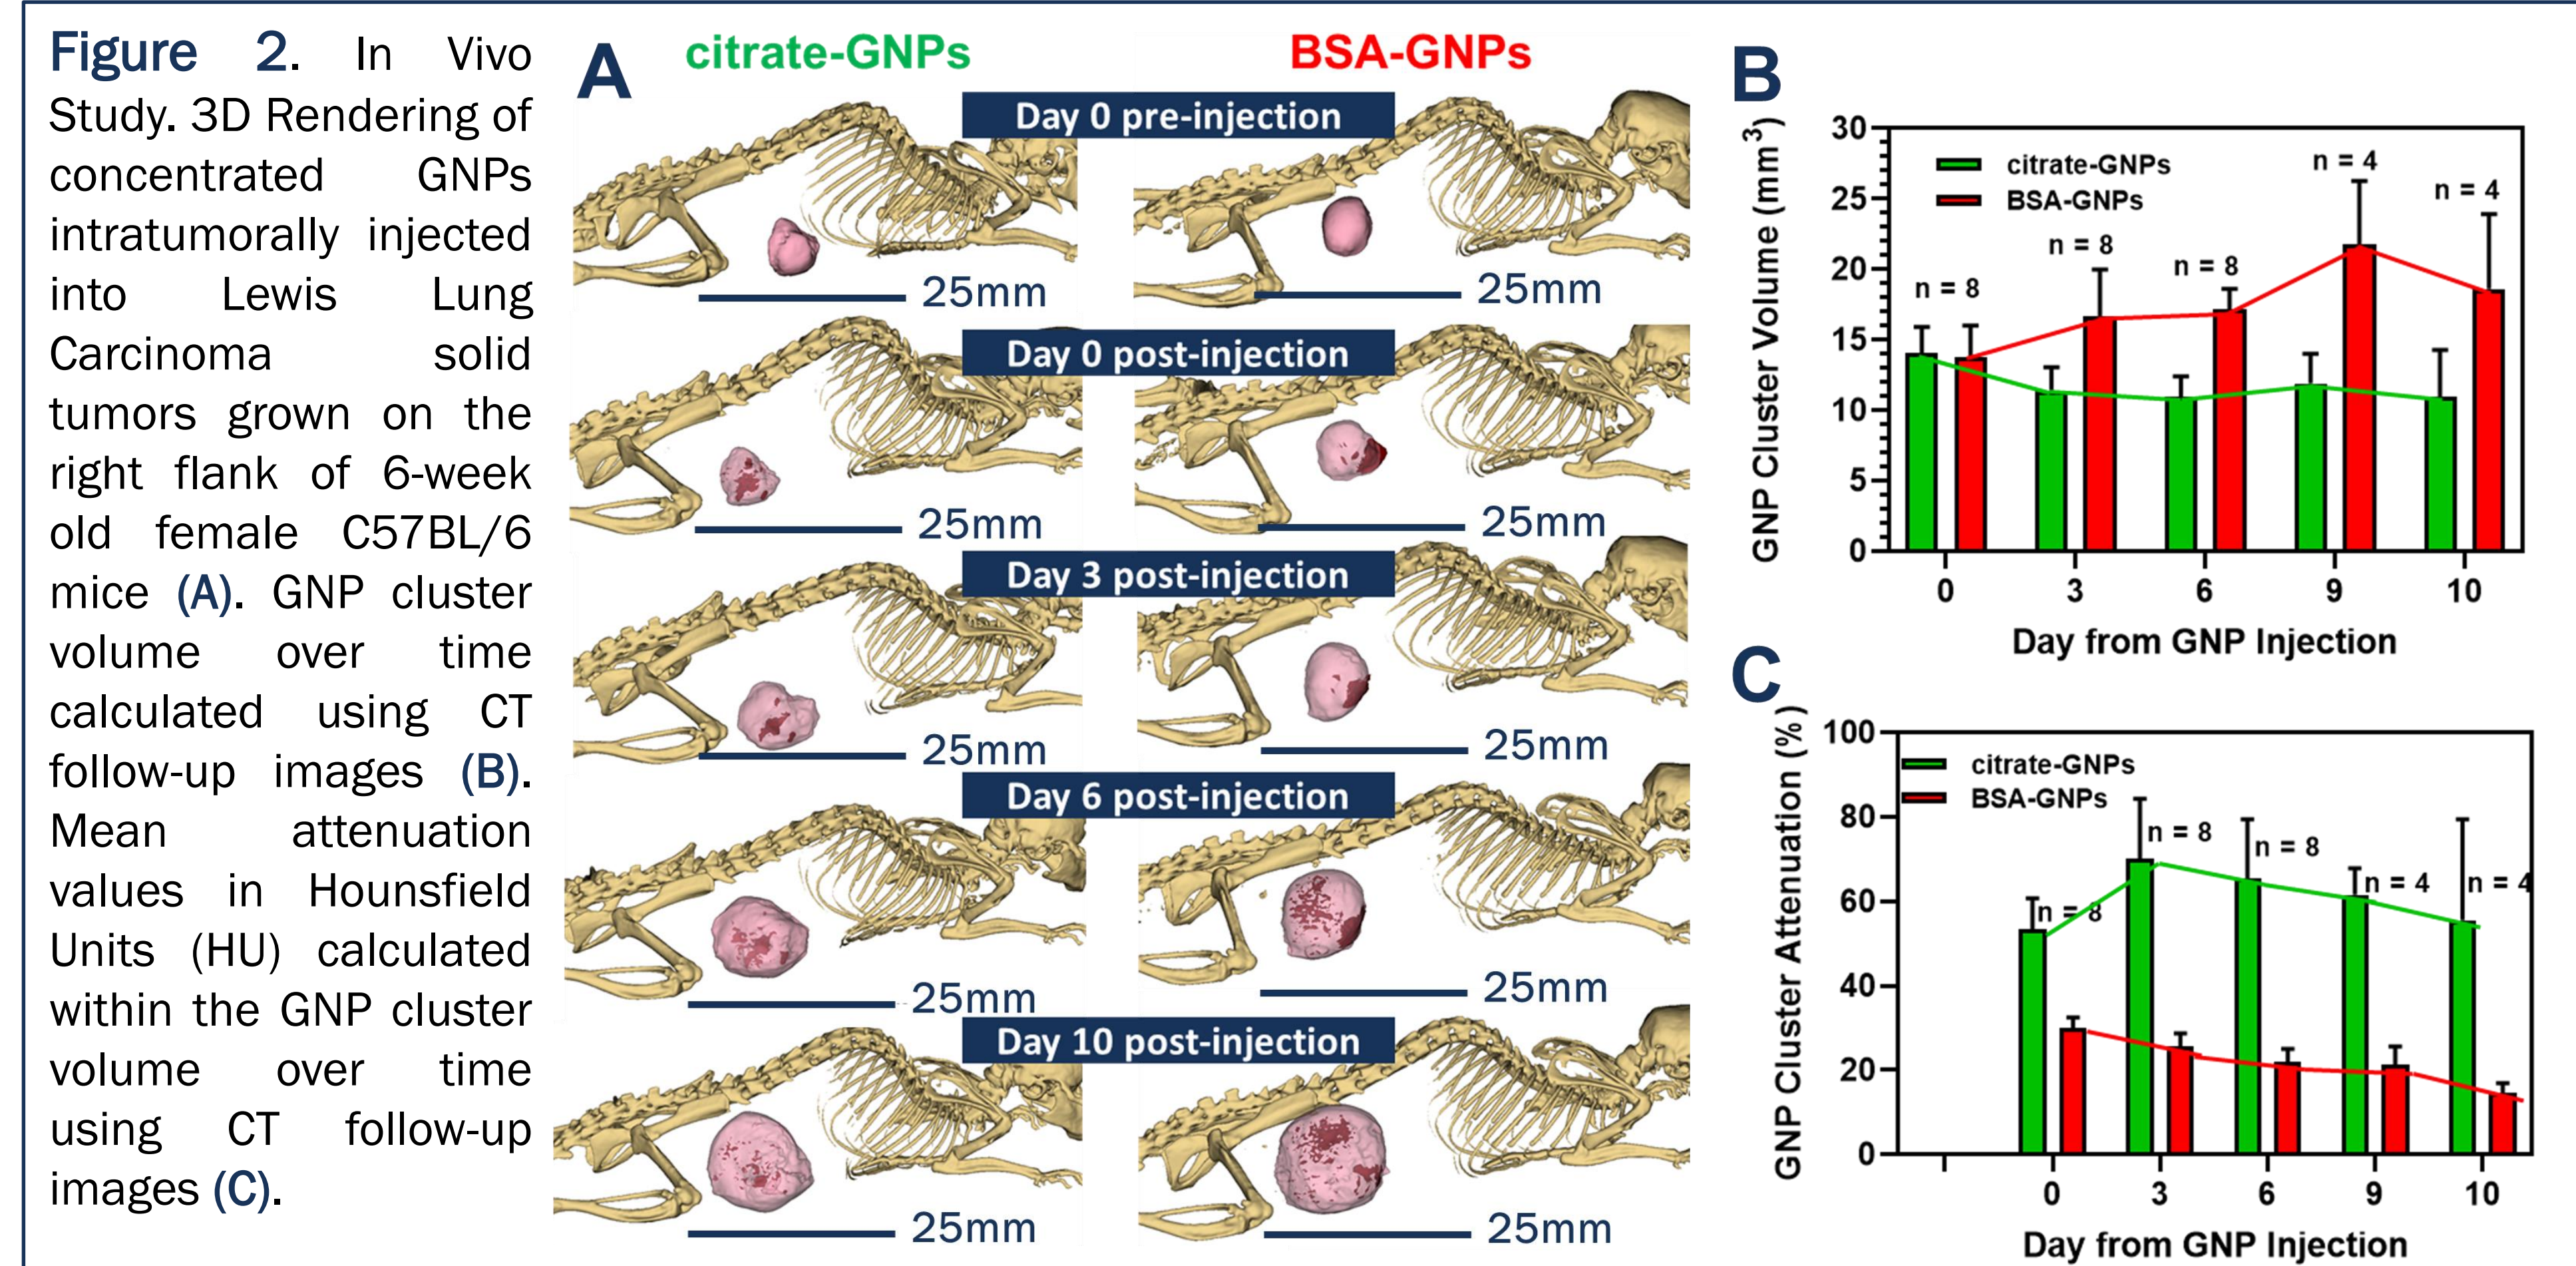

## Results/Implications

- Intratumoral biodistribution of GNPs is dependent on surface passivation.
- BSA-GNPs perfusion along the tumor periphery with few depositions throughout the entire tumor volume diverges from that obtained after unpassivated, citrate-GNP intratumoral injections.
- This response can be explained by the abnormal and heterogeneous vascular structure of the LLC tumor, suggesting perfusion rather than permeability as the limiting factor for tumor accumulation of the GNPs.

## Conclusions

Outcomes of the research: surface passivation of GNPs is able to influence the mechanism of cellular uptake in vitro and their in vivo intratumoral diffusion.

## Acknowledgments

Funding support was received from the Simmons Foundation, Houston Methodist Research Institute (CF), and Golfers Against Cancer agencies. We are grateful to Dr. Xukui Wang, the Houston Methodist Research Institute Translational Imaging PreClinical Imaging (Small Animal) Core, and the Houston Methodist Research Institute Microscopy Core.

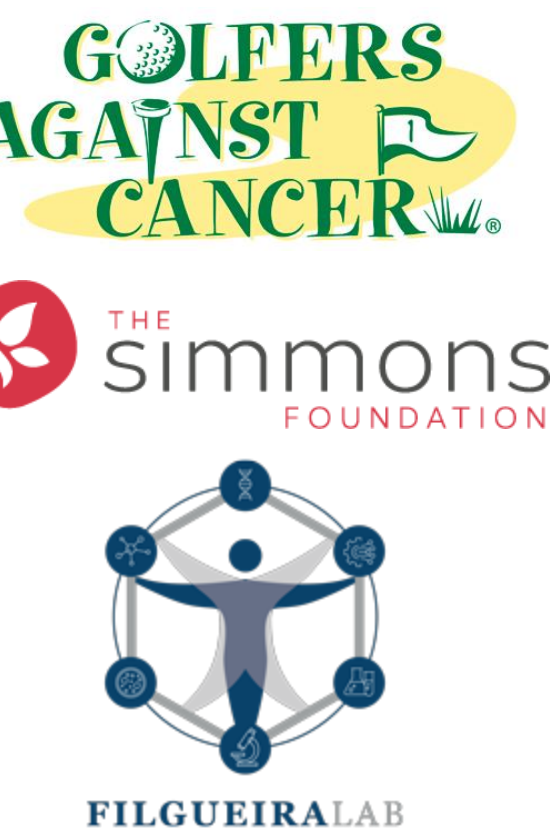

## References

- Huai, Yanyan, et al. "Nanoparticle interactions with the tumor microenvironment." *Bioconjugate chemistry* 30.9 (2019): 2247-2263.
- Guo, Jianfeng, et al. "Gold nanoparticles enlighten the future of cancer theranostics." *International journal of nanomedicine* 12 (2017): 6131.
- M. Mahan and A. L. Doiron, "Gold Nanoparticles as X-Ray, CT, and Multimodal Imaging Contrast Agents: Formulation, Targeting, and Methodology," *Journal of Nanomaterials*, (2018).
- Terracciano, Rossana, et al. "Intratumoral Gold Nanoparticle-Enhanced CT Imaging: An In Vivo Investigation of Biodistribution and Retention." 2020 IEEE 20th International Conference on Nanotechnology (IEEE-NANO). IEEE, 2020.

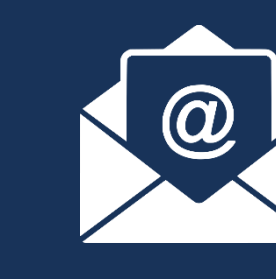

csfilgueira@houstonmethodist.org  
rtterracciano@houstonmethodist.org

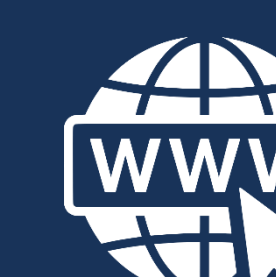

<https://filgueira.hmailabs.org/>
